# Supplementary material for: SequelTools: a suite of tools for working with PacBio Sequel raw sequence data
Source: PubMed Central journal article supplement (PMC7532105; doi:10.1186/s12859-020-03751-8), 2020-10-01
Supplement: 12859_2020_3751_MOESM1_ESM.pdf [file 12859_2020_3751_MOESM1_ESM.pdf]

# SequelTools Supplementary Materials

David E. Hufnagel, Matthew B. Hufford, and Arun S. Seetharam

July 2020

Table S1: Summary statistics table part 1

| SMRTcell             | numReadsCLR | numReadsSubedCLR | numReadsSubread |
|----------------------|-------------|------------------|-----------------|
| m54138_180610_050652 | 666453      | 372032           | 437596          |
| m54138_180610_152029 | 748962      | 454753           | 544731          |
| m54138_180619_053104 | 773389      | 484816           | 575245          |
| m54138_180620_123320 | 915891      | 679218           | 781352          |
| m54138_180620_225343 | 904201      | 628103           | 723088          |
| m54138_180621_091000 | 820010      | 570454           | 653655          |
| m54138_180627_120814 | 766783      | 500556           | 585498          |
| m54138_180627_222429 | 769051      | 469297           | 556407          |

Table S2: Summary statistics table part 2

| numReadsLongestSub | totalBasesCLR | totalBasesSubedCLR | totalBasesSubread |
|--------------------|---------------|--------------------|-------------------|
| 372032             | 9903912080    | 9066577847         | 6156338170        |
| 454753             | 1.2677E+10    | 1.1152E+10         | 6796863421        |
| 484816             | 1.3808E+10    | 1.2595E+10         | 7479347974        |
| 679218             | 2.4638E+10    | 2.1686E+10         | 8673538367        |
| 628103             | 2.2217E+10    | 1.9391E+10         | 8173394973        |
| 570454             | 1.7348E+10    | 1.5889E+10         | 8329279410        |
| 500556             | 1.3653E+10    | 1.2458E+10         | 7384567281        |
| 469297             | 1.2856E+10    | 1.1583E+10         | 6749552695        |

Table S3: Summary statistics table part 3

| totalBasesLongestSub | meanReadLenCLR | meanReadLenSubedCLR |
|----------------------|----------------|---------------------|
| 5.878E+09            | 14861          | 24370               |
| 6.483E+09            | 16926          | 24524               |
| 7.014E+09            | 17854          | 25979               |
| 8.239E+09            | 26901          | 31928               |
| 7.764E+09            | 24571          | 30873               |
| 7.907E+09            | 21156          | 27852               |
| 6.96E+09             | 17806          | 24887               |
| 6.358E+09            | 16717          | 24682               |

Table S4: Summary statistics table part 4

| meanReadLenSubread | meanReadLenLongestSub | medianReadLenCLR |
|--------------------|-----------------------|------------------|
| 14069              | 15801                 | 9027             |
| 12477              | 14256                 | 13233            |
| 13002              | 14467                 | 13901            |
| 11101              | 12130                 | 24471            |
| 11303              | 12362                 | 21699            |
| 12743              | 13861                 | 18831            |
| 12612              | 13904                 | 13181            |
| 12131              | 13549                 | 11390            |

Table S5: Summary statistics table part 5

| medianReadLenSubedCLR | medianReadLenSubread | medianReadLenLongestSub |
|-----------------------|----------------------|-------------------------|
| 22172                 | 11228                | 14073                   |
| 22051                 | 9109                 | 11907                   |
| 23112                 | 10047                | 12210                   |
| 29120                 | 7948                 | 9327                    |
| 27722                 | 8195                 | 9635                    |
| 25018                 | 9901                 | 11489                   |
| 22110                 | 9307                 | 11020                   |
| 21798                 | 8840                 | 10733                   |

Table S6: Summary statistics table part 6

| n50CLR | n50SubedCLR | n50Subread | n50LongestSub | l50CLR |
|--------|-------------|------------|---------------|--------|
| 31280  | 31631       | 23049      | 23612         | 110089 |
| 31778  | 32373       | 21804      | 22341         | 138071 |
| 33914  | 34393       | 21730      | 22391         | 141188 |
| 41020  | 41673       | 19646      | 20203         | 218456 |
| 39894  | 40787       | 19880      | 20433         | 199129 |
| 36029  | 36629       | 21177      | 21706         | 171283 |
| 33912  | 34374       | 21517      | 22200         | 140570 |
| 33421  | 34017       | 21077      | 21747         | 132950 |

Table S7: Summary statistics table part 7

| l50SubedCLR | l50Subread | l50LongestSub | PSR   | ZOR   |
|-------------|------------|---------------|-------|-------|
| 100336      | 93650      | 87778         | 0.955 | 0.85  |
| 120233      | 109438     | 102443        | 0.954 | 0.835 |
| 127745      | 120785     | 110533        | 0.938 | 0.843 |
| 190145      | 153025     | 142368        | 0.95  | 0.869 |
| 171306      | 143674     | 133758        | 0.95  | 0.869 |
| 155271      | 138592     | 128978        | 0.949 | 0.873 |
| 127325      | 119017     | 109528        | 0.942 | 0.855 |
| 118603      | 111464     | 102569        | 0.942 | 0.843 |

Table S8: Assembly statistics for raw reads and reads filtered by CLR length using the Read Filtering tool

| Metrics                                                   | All Reads   | CLR $\geq$ 5Kb |
|-----------------------------------------------------------|-------------|----------------|
| Number of scaffolds                                       | 555         | 659            |
| Total size of scaffolds                                   | 124,850,704 | 126,349,435    |
| Total scaffold length<br>(% of 135Mb assumed genome size) | 92.5%       | 93.6%          |
| Longest scaffold                                          | 4,243,121   | 4,243,141      |
| Shortest scaffold                                         | 2,357       | 6,520          |
| Number of scaffolds $>$ 1Kb                               | 555         | 659            |
| Number of scaffolds $>$ 10Kb                              | 528         | 649            |
| Number of scaffolds $>$ 100Kb                             | 219         | 253            |
| Number of scaffolds $>$ 1Mb                               | 30          | 24             |
| Mean scaffold size                                        | 224,956     | 191,729        |
| Median scaffold size                                      | 65,852      | 62,543         |
| N50 scaffold length                                       | 699,106     | 576,605        |
| L50 scaffold count                                        | 46          | 60             |

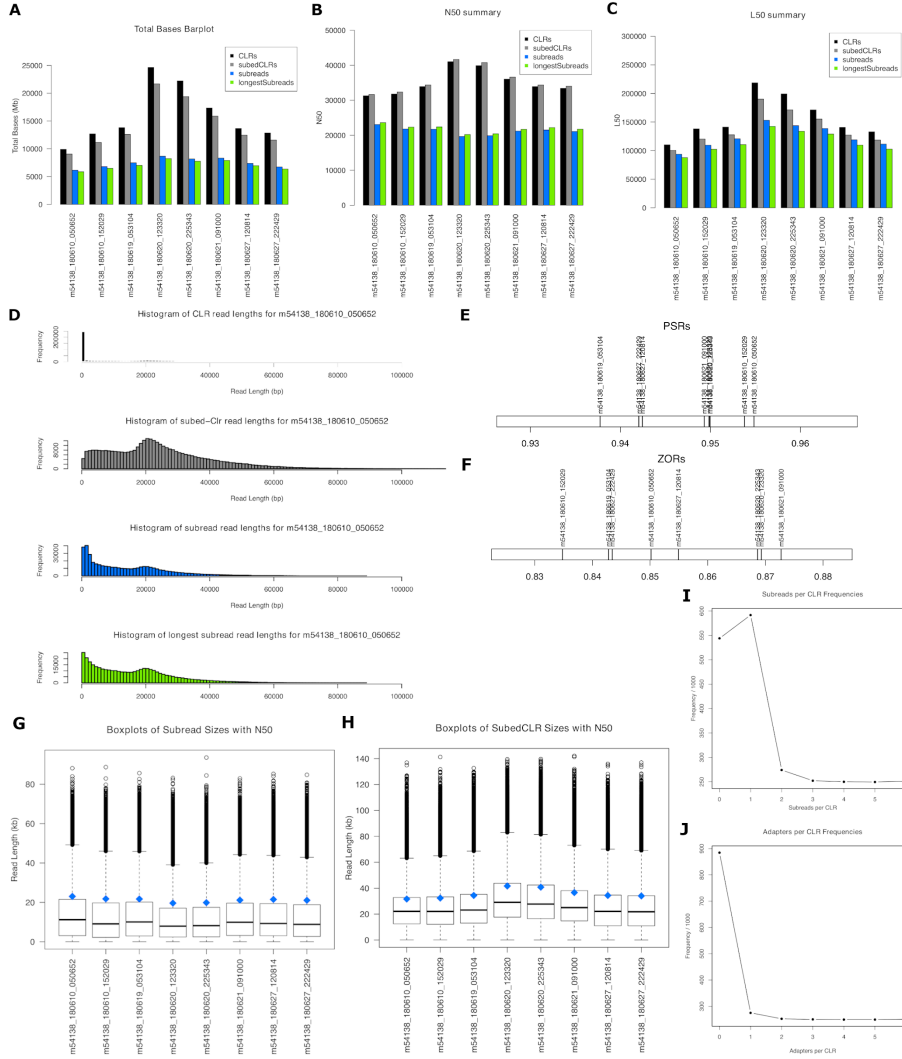

Figure S1: All plots generated by *SequelTools*. (A) A barplot of the sum of read lengths, (B) A barplot of N50s, (C) A barplot of L50s, (D) Read length histograms for m54138\_180610\_050652, (E) A two dimensional plot of PSRs, (F) A two dimensional plot of ZORs, (G) Boxplots of subread lengths with N50s as blue diamonds, (H) Boxplots of subreadCLR lengths with N50s as blue diamonds, (I) A frequency plot showing the distribution of subreads per CLR, and (J) A frequency plot showing the distribution of adapters per CLR, for all SMRTcells in our benchmarking data set.
